# Supplementary material for: Transcriptomic and lipidomic analysis of the differential pathway contribution to the incorporation of erucic acid to triacylglycerol during Pennycress seed maturation
Source: Front Plant Sci. 2024 Apr 26;15:1386023. doi: 10.3389/fpls.2024.1386023 (PMC11082276; doi:10.3389/fpls.2024.1386023)
Supplement: Supplementary file 7 [file Table_7.xlsx]

## Sheet: Feuil1
segment 1: 0 to 9 min
MRM
Compound Group	Compound Name	Precursor Ion	MS1 Res	Product Ion	MS2 Res	Dwell	Fragmentor	Collision Energy	Cell Accelerator Voltage	Polarity
DAG	DAG-18-1_22-1	694	Widest	395	Unit	30	150	19	4	Positive
DAG	DAG-18-1_22-1	694	Widest	339	Unit	30	150	19	4	Positive
DAG	DAG-18-2_22-1	692	Widest	395	Unit	30	150	19	4	Positive
DAG	DAG-18-2_22-1	692	Widest	337	Unit	30	150	19	4	Positive
DAG	DAG-18-3_22-1	690	Widest	395	Unit	30	150	19	4	Positive
DAG	DAG-18-3_22-1	690	Widest	335	Unit	30	150	19	4	Positive
DAG	DAG-18-1_20-1	666	Widest	367	Unit	30	150	19	4	Positive
DAG	DAG-18-1_20-1	666	Widest	339	Unit	30	150	19	4	Positive
DAG	DAG-18-2_20-1	664	Widest	367	Unit	30	150	19	4	Positive
DAG	DAG-18-1_20-2	664	Widest	365	Unit	30	150	19	4	Positive
DAG	DAG-18-1_20-2	664	Widest	339	Unit	30	150	19	4	Positive
DAG	DAG-18-2_20-1	664	Widest	337	Unit	30	150	19	4	Positive
DAG	DAG-18-3_20-1	662	Widest	367	Unit	30	150	19	4	Positive
DAG	DAG-18-2_20-2	662	Widest	365	Unit	30	150	19	4	Positive
DAG	DAG-18-2_20-2	662	Widest	337	Unit	30	150	19	4	Positive
DAG	DAG-18-3_20-1	662	Widest	335	Unit	30	150	19	4	Positive
DAG	DAG-18-3_20-2	660	Widest	365	Unit	30	150	19	4	Positive
DAG	DAG-18-3_20-2	660	Widest	335	Unit	30	150	19	4	Positive
DAG	DAG-18-1_18-1	638	Widest	339	Unit	30	150	19	4	Positive
DAG	DAG-18-2_18-1	636	Widest	339	Unit	30	150	19	4	Positive
DAG	DAG-18-2_18-1	636	Widest	337	Unit	30	150	19	4	Positive
DAG	DAG-18-3_18-1	634	Widest	339	Unit	30	150	19	4	Positive
DAG	DAG-18-2_18-2	634	Widest	337	Unit	30	150	19	4	Positive
DAG	DAG-18-3_18-1	634	Widest	335	Unit	30	150	19	4	Positive
DAG	DAG-18-3_18-2	632	Widest	337	Unit	30	150	19	4	Positive
DAG	DAG-18-3_18-2	632	Widest	335	Unit	30	150	19	4	Positive
DAG	DAG-18-3_18-3	630	Widest	335	Unit	30	150	19	4	Positive
DAG	DAG-16-0_18-0	614	Widest	341	Unit	30	150	19	4	Positive
DAG	DAG-16-0_18-0	614	Widest	313	Unit	30	150	19	4	Positive
DAG	DAG-16-0_18-1	612	Widest	339	Unit	30	150	19	4	Positive
DAG	DAG-16-0_18-1	612	Widest	313	Unit	30	150	19	4	Positive
DAG	DAG-16-0_18-2	610	Widest	337	Unit	30	150	19	4	Positive
DAG	DAG-16-0_18-2	610	Widest	313	Unit	30	150	19	4	Positive
DAG	DAG-16-1_18-2	608	Widest	337	Unit	30	150	19	4	Positive
DAG	DAG-16-0_18-3	608	Widest	335	Unit	30	150	19	4	Positive
DAG	DAG-16-0_18-3	608	Widest	313	Unit	30	150	19	4	Positive
DAG	DAG-16-1_18-2	608	Widest	311	Unit	30	150	19	4	Positive
DAG	DAG-16-0_16-0	586	Widest	313	Unit	30	150	19	4	Positive
DAG	DAG-16-0_16-1	584	Widest	313	Unit	30	150	19	4	Positive
DAG	DAG-16-0_16-1	584	Widest	311	Unit	30	150	19	4	Positive
DGDG	DGDG-36-0	966	Widest	625	Unit	30	150	11	4	Positive
DGDG	DGDG-36-1	964	Widest	623	Unit	30	150	11	4	Positive
DGDG	DGDG-36-2	962	Widest	621	Unit	30	150	11	4	Positive
DGDG	DGDG-36-3	960	Widest	619	Unit	30	150	11	4	Positive
DGDG	DGDG-36-4	958	Widest	617	Unit	30	150	11	4	Positive
DGDG	DGDG-36-5	956	Widest	615	Unit	30	150	11	4	Positive
DGDG	DGDG-36-6	954	Widest	613	Unit	30	150	11	4	Positive
DGDG	DGDG-34-0	938	Widest	597	Unit	30	150	11	4	Positive
DGDG	DGDG-34-1	936	Widest	595	Unit	30	150	11	4	Positive
DGDG	DGDG-34-2	934	Widest	593	Unit	30	150	11	4	Positive
DGDG	DGDG-34-3	932	Widest	591	Unit	30	150	11	4	Positive
DGDG	DGDG-34-4	930	Widest	589	Unit	30	150	11	4	Positive
DGDG	DGDG-34-5	928	Widest	587	Unit	30	150	11	4	Positive
DGDG	DGDG-34-6	926	Widest	585	Unit	30	150	11	4	Positive
DGDG	DGDG-32-1	908	Widest	567	Unit	30	150	11	4	Positive
DGDG	DGDG-32-2	906	Widest	565	Unit	30	150	11	4	Positive
DGDG	DGDG-32-3	904	Widest	563	Unit	30	150	11	4	Positive
MGDG	MGDG-36-0	804	Widest	625	Unit	30	150	8	4	Positive
MGDG	MGDG-36-1	802	Widest	623	Unit	30	150	8	4	Positive
MGDG	MGDG-36-2	800	Widest	621	Unit	30	150	8	4	Positive
MGDG	MGDG-36-3	798	Widest	619	Unit	30	150	8	4	Positive
MGDG	MGDG-36-4	796	Widest	617	Unit	30	150	8	4	Positive
MGDG	MGDG-36-5	794	Widest	615	Unit	30	150	8	4	Positive
MGDG	MGDG-36-6	792	Widest	613	Unit	30	150	8	4	Positive
MGDG	MGDG-34-0	776	Widest	597	Unit	30	150	8	4	Positive
MGDG	MGDG-34-1	774	Widest	595	Unit	30	150	8	4	Positive
MGDG	MGDG-34-2	772	Widest	593	Unit	30	150	8	4	Positive
MGDG	MGDG-34-3	770	Widest	591	Unit	30	150	8	4	Positive
MGDG	MGDG-34-4	768	Widest	589	Unit	30	150	8	4	Positive
MGDG	MGDG-34-5	766	Widest	587	Unit	30	150	8	4	Positive
MGDG	MGDG-34-6	764	Widest	585	Unit	30	150	8	4	Positive
MGDG	MGDG-32-0	748	Widest	569	Unit	30	150	8	4	Positive
MGDG	MGDG-32-1	746	Widest	567	Unit	30	150	8	4	Positive
MGDG	MGDG-32-2	744	Widest	565	Unit	30	150	8	4	Positive
MGDG	MGDG-32-3	742	Widest	563	Unit	30	150	8	4	Positive
PE	PE-40-2	800	Widest	659	Unit	30	150	29	4	Positive
PE	PE-40-3	798	Widest	657	Unit	30	150	29	4	Positive
PE	PE-40-4	796	Widest	655	Unit	30	150	29	4	Positive
PE	PE-38-2	772	Widest	631	Unit	30	150	29	4	Positive
PE	PE-38-3	770	Widest	629	Unit	30	150	29	4	Positive
PE	PE-38-4	768	Widest	627	Unit	30	150	29	4	Positive
PE	PE-36-1	746	Widest	605	Unit	30	150	29	4	Positive
PE	PE-36-2	744	Widest	603	Unit	30	150	29	4	Positive
PE	PE-36-3	742	Widest	601	Unit	30	150	29	4	Positive
PE	PE-36-4	740	Widest	599	Unit	30	150	29	4	Positive
PE	PE-36-5	738	Widest	597	Unit	30	150	29	4	Positive
PE	PE-36-6	736	Widest	595	Unit	30	150	29	4	Positive
PE	PE-34-1	718	Widest	577	Unit	30	150	29	4	Positive
PE	PE-34-2	716	Widest	575	Unit	30	150	29	4	Positive
PE	PE-34-3	714	Widest	573	Unit	30	150	29	4	Positive
PE	PE-34-4	712	Widest	571	Unit	30	150	29	4	Positive
PE	PE-32-1	690	Widest	549	Unit	30	150	29	4	Positive
PE	PE-32-2	688	Widest	547	Unit	30	150	29	4	Positive
std DAG	DAG-18-0_22-6	686	Widest	385	Unit	30	150	19	4	Positive
std DAG	DAG-18-0_22-6	686	Widest	341	Unit	30	150	19	4	Positive
std PE	PE-36-0	748	Widest	607	Unit	30	150	29	4	Positive
TAG	TAG-64:3	1042.4	Widest	743.4	Unit	30	150	26	4	Positive
TAG	TAG-64:3	1042.4	Widest	715.4	Unit	30	150	26	4	Positive
TAG	TAG-64:3	1042.4	Widest	687.4	Unit	30	150	26	4	Positive
TAG	TAG-64:3	1042.4	Widest	659.4	Unit	30	150	26	4	Positive
TAG	TAG-64:4	1040.4	Widest	743.4	Unit	30	150	26	4	Positive
TAG	TAG-64:4	1040.4	Widest	685.4	Unit	30	150	26	4	Positive
TAG	TAG-64:4	1040.4	Widest	657.4	Unit	30	150	26	4	Positive
TAG	TAG-64:5	1038.4	Widest	743.4	Unit	30	150	26	4	Positive
TAG	TAG-64:5	1038.4	Widest	683.4	Unit	30	150	26	4	Positive
TAG	TAG-64:5	1038.4	Widest	655.4	Unit	30	150	26	4	Positive
TAG	TAG-62:3	1014.4	Widest	715.4	Unit	30	150	26	4	Positive
TAG	TAG-62:3	1014.4	Widest	687.4	Unit	30	150	26	4	Positive
TAG	TAG-62:3	1014.4	Widest	659.4	Unit	30	150	26	4	Positive
TAG	TAG-62:3	1014.4	Widest	631.4	Unit	30	150	26	4	Positive
TAG	TAG-62:4	1012.4	Widest	715.4	Unit	30	150	26	4	Positive
TAG	TAG-62:4	1012.4	Widest	685.4	Unit	30	150	26	4	Positive
TAG	TAG-62:4	1012.4	Widest	657.4	Unit	30	150	26	4	Positive
TAG	TAG-62:4	1012.4	Widest	629.4	Unit	30	150	26	4	Positive
TAG	TAG-62:5	1010.4	Widest	715.4	Unit	30	150	26	4	Positive
TAG	TAG-62:5	1010.4	Widest	683.4	Unit	30	150	26	4	Positive
TAG	TAG-62:5	1010.4	Widest	655.4	Unit	30	150	26	4	Positive
TAG	TAG-62:5	1010.4	Widest	627.4	Unit	30	150	26	4	Positive
TAG	TAG-60:3	986.4	Widest	687.4	Unit	30	150	26	4	Positive
TAG	TAG-60:3	986.4	Widest	659.4	Unit	30	150	26	4	Positive
TAG	TAG-60:3	986.4	Widest	631.4	Unit	30	150	26	4	Positive
TAG	TAG-60:3	986.4	Widest	603.4	Unit	30	150	26	4	Positive
TAG	TAG-60:4	984.4	Widest	687.4	Unit	30	150	26	4	Positive
TAG	TAG-60:4	984.4	Widest	685.4	Unit	30	150	26	4	Positive
TAG	TAG-60:4	984.4	Widest	629.4	Unit	30	150	26	4	Positive
TAG	TAG-60:4	984.4	Widest	601.4	Unit	30	150	26	4	Positive
TAG	TAG-60:5	982.4	Widest	687.4	Unit	30	150	26	4	Positive
TAG	TAG-60:5	982.4	Widest	655.4	Unit	30	150	26	4	Positive
TAG	TAG-60:5	982.4	Widest	627.4	Unit	30	150	26	4	Positive
TAG	TAG-58:2	960.4	Widest	663.4	Unit	30	150	26	4	Positive
TAG	TAG-58:2	960.4	Widest	661.4	Unit	30	150	26	4	Positive
TAG	TAG-58:2	960.4	Widest	605.4	Unit	30	150	26	4	Positive
TAG	TAG-58:3	958.4	Widest	661.4	Unit	30	150	26	4	Positive
TAG	TAG-58:3	958.4	Widest	659.4	Unit	30	150	26	4	Positive
TAG	TAG-58:3	958.4	Widest	631.4	Unit	30	150	26	4	Positive
TAG	TAG-58:3	958.4	Widest	603.4	Unit	30	150	26	4	Positive
TAG	TAG-58:4	956.4	Widest	661.4	Unit	30	150	26	4	Positive
TAG	TAG-58:4	956.4	Widest	659.4	Unit	30	150	26	4	Positive
TAG	TAG-58:4	956.4	Widest	657.4	Unit	30	150	26	4	Positive
TAG	TAG-58:4	956.4	Widest	655.4	Unit	30	150	26	4	Positive
TAG	TAG-58:4	956.4	Widest	601.4	Unit	30	150	26	4	Positive
TAG	TAG-58:5	954.4	Widest	659.4	Unit	30	150	26	4	Positive
TAG	TAG-58:5	954.4	Widest	657.4	Unit	30	150	26	4	Positive
TAG	TAG-58:5	954.4	Widest	655.4	Unit	30	150	26	4	Positive
TAG	TAG-58:5	954.4	Widest	627.4	Unit	30	150	26	4	Positive
TAG	TAG-58:5	954.4	Widest	599.4	Unit	30	150	26	4	Positive
TAG	TAG-58:6	952.4	Widest	657.4	Unit	30	150	26	4	Positive
TAG	TAG-58:6	952.4	Widest	655.4	Unit	30	150	26	4	Positive
TAG	TAG-58:6	952.4	Widest	597.4	Unit	30	150	26	4	Positive
TAG	TAG-56:2	932.4	Widest	659.4	Unit	30	150	26	4	Positive
TAG	TAG-56:2	932.4	Widest	633.4	Unit	30	150	26	4	Positive
TAG	TAG-56:2	932.4	Widest	577.4	Unit	30	150	26	4	Positive
TAG	TAG-56:3	930.4	Widest	657.4	Unit	30	150	26	4	Positive
TAG	TAG-56:3	930.4	Widest	633.4	Unit	30	150	26	4	Positive
TAG	TAG-56:3	930.4	Widest	631.4	Unit	30	150	26	4	Positive
TAG	TAG-56:3	930.4	Widest	603.4	Unit	30	150	26	4	Positive
TAG	TAG-56:3	930.4	Widest	575.4	Unit	30	150	26	4	Positive
TAG	TAG-56:4	928.6	Widest	655.4	Unit	30	150	26	4	Positive
TAG	TAG-56:4	928.6	Widest	633.4	Unit	30	150	26	4	Positive
TAG	TAG-56:4	928.6	Widest	631.4	Unit	30	150	26	4	Positive
TAG	TAG-56:4	928.6	Widest	629.4	Unit	30	150	26	4	Positive
TAG	TAG-56:4	928.6	Widest	601.4	Unit	30	150	26	4	Positive
TAG	TAG-56:4	928.6	Widest	573.4	Unit	30	150	26	4	Positive
TAG	TAG-56:5	926.6	Widest	631.4	Unit	30	150	26	4	Positive
TAG	TAG-56:5	926.6	Widest	629.4	Unit	30	150	26	4	Positive
TAG	TAG-56:5	926.6	Widest	627.4	Unit	30	150	26	4	Positive
TAG	TAG-56:5	926.6	Widest	599.4	Unit	30	150	26	4	Positive
TAG	TAG-54:2	904.4	Widest	605.4	Unit	30	150	26	4	Positive
TAG	TAG-54:2	904.4	Widest	603.4	Unit	30	150	26	4	Positive
TAG	TAG-54:3	902.4	Widest	629.4	Unit	30	150	26	4	Positive
TAG	TAG-54:3	902.4	Widest	605.4	Unit	30	150	26	4	Positive
TAG	TAG-54:3	902.4	Widest	603.4	Unit	30	150	26	4	Positive
TAG	TAG-54:3	902.4	Widest	575.4	Unit	30	150	26	4	Positive
TAG	TAG-54:4	900.4	Widest	627.4	Unit	30	150	26	4	Positive
TAG	TAG-54:4	900.4	Widest	605.4	Unit	30	150	26	4	Positive
TAG	TAG-54:4	900.4	Widest	603.4	Unit	30	150	26	4	Positive
TAG	TAG-54:4	900.4	Widest	601.4	Unit	30	150	26	4	Positive
TAG	TAG-54:4	900.4	Widest	573.4	Unit	30	150	26	4	Positive
TAG	TAG-54:5	898.4	Widest	603.4	Unit	30	150	26	4	Positive
TAG	TAG-54:5	898.4	Widest	601.4	Unit	30	150	26	4	Positive
TAG	TAG-54:5	898.4	Widest	599.4	Unit	30	150	26	4	Positive
TAG	TAG-54:6	896.4	Widest	601.4	Unit	30	150	26	4	Positive
TAG	TAG-54:6	896.4	Widest	599.4	Unit	30	150	26	4	Positive
TAG	TAG-54:6	896.4	Widest	597.4	Unit	30	150	26	4	Positive
segment 2: 9 to 18 min
MRM
Compound Group	Compound Name	Precursor Ion	MS1 Res	Product Ion	MS2 Res	Dwell	Fragmentor	Collision Energy	Cell Accelerator Voltage	Polarity
DGDG	DGDG-36-0	966	Widest	625	Unit	30	150	8	4	Positive
DGDG	DGDG-36-1	964	Widest	623	Unit	30	150	11	4	Positive
DGDG	DGDG-36-2	962	Widest	621	Unit	30	150	11	4	Positive
DGDG	DGDG-36-3	960	Widest	619	Unit	30	150	11	4	Positive
DGDG	DGDG-36-4	958	Widest	617	Unit	30	150	11	4	Positive
DGDG	DGDG-36-5	956	Widest	615	Unit	30	150	11	4	Positive
DGDG	DGDG-36-6	954	Widest	613	Unit	30	150	11	4	Positive
DGDG	DGDG-34-0	938	Widest	597	Unit	30	150	11	4	Positive
DGDG	DGDG-34-1	936	Widest	595	Unit	30	150	11	4	Positive
DGDG	DGDG-34-2	934	Widest	593	Unit	30	150	11	4	Positive
DGDG	DGDG-34-3	932	Widest	591	Unit	30	150	11	4	Positive
DGDG	DGDG-34-4	930	Widest	589	Unit	30	150	11	4	Positive
DGDG	DGDG-34-5	928	Widest	587	Unit	30	150	11	4	Positive
DGDG	DGDG-34-6	926	Widest	585	Unit	30	150	11	4	Positive
DGDG	DGDG-32-1	908	Widest	567	Unit	30	150	11	4	Positive
DGDG	DGDG-32-2	906	Widest	565	Unit	30	150	11	4	Positive
DGDG	DGDG-32-3	904	Widest	563	Unit	30	150	11	4	Positive
MGDG	MGDG-36-1	802	Widest	623	Unit	30	150	8	4	Positive
MGDG	MGDG-36-2	800	Widest	621	Unit	30	150	8	4	Positive
MGDG	MGDG-36-4	796	Widest	617	Unit	30	150	8	4	Positive
MGDG	MGDG-36-5	794	Widest	615	Unit	30	150	8	4	Positive
MGDG	MGDG-36-6	792	Widest	613	Unit	30	150	8	4	Positive
MGDG	MGDG-34-0	776	Widest	597	Unit	30	150	8	4	Positive
MGDG	MGDG-34-3	770	Widest	591	Unit	30	150	8	4	Positive
MGDG	MGDG-34-4	768	Widest	589	Unit	30	150	8	4	Positive
MGDG	MGDG-34-5	766	Widest	587	Unit	30	150	8	4	Positive
MGDG	MGDG-34-6	764	Widest	585	Unit	30	150	8	4	Positive
MGDG	MGDG-32-0	748	Widest	569	Unit	30	150	8	4	Positive
MGDG	MGDG-32-1	746	Widest	567	Unit	30	150	8	4	Positive
MGDG	MGDG-32-2	744	Widest	565	Unit	30	150	8	4	Positive
MGDG	MGDG-32-3	742	Widest	563	Unit	30	150	8	4	Positive
PE	PE-40-2	800	Widest	659	Unit	30	150	29	4	Positive
PE	PE-40-3	798	Widest	657	Unit	30	150	29	4	Positive
PE	PE-40-4	796	Widest	655	Unit	30	150	29	4	Positive
PE	PE-38-2	772	Widest	631	Unit	30	150	29	4	Positive
PE	PE-38-3	770	Widest	629	Unit	30	150	29	4	Positive
PE	PE-38-4	768	Widest	627	Unit	30	150	29	4	Positive
PE	PE-36-1	746	Widest	605	Unit	30	150	29	4	Positive
PE	PE-36-2	744	Widest	603	Unit	30	150	29	4	Positive
PE	PE-36-3	742	Widest	601	Unit	30	150	29	4	Positive
PE	PE-36-4	740	Widest	599	Unit	30	150	29	4	Positive
PE	PE-36-5	738	Widest	597	Unit	30	150	29	4	Positive
PE	PE-36-6	736	Widest	595	Unit	30	150	29	4	Positive
PE	PE-34-1	718	Widest	577	Unit	30	150	29	4	Positive
PE	PE-34-2	716	Widest	575	Unit	30	150	29	4	Positive
PE	PE-34-3	714	Widest	573	Unit	30	150	29	4	Positive
PE	PE-34-4	712	Widest	571	Unit	30	150	29	4	Positive
PE	PE-32-1	690	Widest	549	Unit	30	150	29	4	Positive
PE	PE-32-2	688	Widest	547	Unit	30	150	29	4	Positive
std PE	PE-36-0	748	Widest	607	Unit	30	150	29	4	Positive
segment 3: 18 to 40 min
MRM
Compound Group	Compound Name	Precursor Ion	MS1 Res	Product Ion	MS2 Res	Dwell	Fragmentor	Collision Energy	Cell Accelerator Voltage	Polarity
DPG	DPG_72-7__18-2_18-2_18-2_18-1_ ou _18-3_18-2_18-1_18-1	1450	Widest	697	Unit	50	150	54	4	Negative
DPG	DPG_72-7__18-2_18-2_18-2_18-1_ ou _18-3_18-2_18-1_18-1	1450	Widest	695	Unit	50	150	54	4	Negative
DPG	DPG_72-7__18-2_18-2_18-2_18-1_ ou _18-3_18-2_18-1_18-1	1450	Widest	693	Unit	50	150	54	4	Negative
DPG	DPG_72-8__18-2_18-2_18-2_18-2_ ou _18-3_18-3_18-1_18-1_ou_18-3_18-2_18-2_18-1	1448	Widest	699	Unit	50	150	54	4	Negative
DPG	DPG_72-8__18-2_18-2_18-2_18-2_ ou _18-3_18-3_18-1_18-1_ou_18-3_18-2_18-2_18-1	1448	Widest	697	Unit	50	150	54	4	Negative
DPG	DPG_72-8__18-2_18-2_18-2_18-2_ ou _18-3_18-3_18-1_18-1_ou_18-3_18-2_18-2_18-1	1448	Widest	695	Unit	50	150	54	4	Negative
DPG	DPG_72-8__18-2_18-2_18-2_18-2_ ou _18-3_18-3_18-1_18-1_ou_18-3_18-2_18-2_18-1	1448	Widest	693	Unit	50	150	54	4	Negative
DPG	DPG_72-8__18-2_18-2_18-2_18-2_ ou _18-3_18-3_18-1_18-1_ou_18-3_18-2_18-2_18-1	1448	Widest	691	Unit	50	150	54	4	Negative
DPG	DPG_72-9__18-3_18-2_18-2_18-2_ ou _18-3_18-3_18-2_18-1	1446	Widest	697	Unit	50	150	54	4	Negative
DPG	DPG_72-9__18-3_18-2_18-2_18-2_ ou _18-3_18-3_18-2_18-1	1446	Widest	695	Unit	50	150	54	4	Negative
DPG	DPG_72-9__18-3_18-2_18-2_18-2_ ou _18-3_18-3_18-2_18-1	1446	Widest	693	Unit	50	150	54	4	Negative
DPG	DPG_72-9__18-3_18-2_18-2_18-2_ ou _18-3_18-3_18-2_18-1	1446	Widest	691	Unit	50	150	54	4	Negative
DPG	DPG_72-10__18-3_18-3_18-2_18-2_ ou _18-3_18-3_18-3_18-1	1444	Widest	695	Unit	50	150	54	4	Negative
DPG	DPG_72-10__18-3_18-3_18-2_18-2_ ou _18-3_18-3_18-3_18-1	1444	Widest	693	Unit	50	150	54	4	Negative
DPG	DPG_72-10__18-3_18-3_18-2_18-2_ ou _18-3_18-3_18-3_18-1	1444	Widest	691	Unit	50	150	54	4	Negative
DPG	DPG_72-11__18-3_18-3_18-3_18-2	1442	Widest	693	Unit	50	150	54	4	Negative
DPG	DPG_72-11__18-3_18-3_18-3_18-2	1442	Widest	691	Unit	50	150	54	4	Negative
DPG	DPG_72-12__18-3_18-3_18-3_18-3	1440	Widest	691	Unit	50	150	54	4	Negative
DPG	DPG_70-7__18-3_18-2_18-2_16-0_ou_18-3_18-3_18-1_16-0	1422	Widest	695	Unit	50	150	54	4	Negative
DPG	DPG_70-7__18-3_18-2_18-2_16-0_ou_18-3_18-3_18-1_16-0	1422	Widest	693	Unit	50	150	54	4	Negative
DPG	DPG_70-7__18-3_18-2_18-2_16-0_ou_18-3_18-3_18-1_16-0	1422	Widest	673	Unit	50	150	54	4	Negative
DPG	DPG_70-7__18-3_18-2_18-2_16-0_ou_18-3_18-3_18-1_16-0	1422	Widest	671	Unit	50	150	54	4	Negative
DPG	DPG_70-7__18-3_18-2_18-2_16-0_ou_18-3_18-3_18-1_16-0	1422	Widest	669	Unit	50	150	54	4	Negative
DPG	DPG_70-8_18:3_18-3_18-2_16-0	1420	Widest	693	Unit	50	150	54	4	Negative
DPG	DPG_70-8_18:3_18-3_18-2_16-0	1420	Widest	691	Unit	50	150	54	4	Negative
DPG	DPG_70-8_18:3_18-3_18-2_16-0	1420	Widest	671	Unit	50	150	54	4	Negative
DPG	DPG_70-8_18:3_18-3_18-2_16-0	1420	Widest	669	Unit	50	150	54	4	Negative
DPG	DPG_70-9__18-3_18-3_18-3_16-0	1418	Widest	691	Unit	50	150	54	4	Negative
DPG	DPG_70-9__18-3_18-3_18-3_16-0	1418	Widest	669	Unit	50	150	54	4	Negative
PA	PA-40-2	774	Widest	659	Unit	30	150	25	4	Positive
PA	PA-40-3	772	Widest	657	Unit	30	150	25	4	Positive
PA	PA-40-4	770	Widest	655	Unit	30	150	25	4	Positive
PA	PA-38-2	746	Widest	631	Unit	30	150	25	4	Positive
PA	PA-38-3	744	Widest	629	Unit	30	150	25	4	Positive
PA	PA-38-4	742	Widest	627	Unit	30	150	25	4	Positive
PA	PA-36-1	720	Widest	605	Unit	30	150	25	4	Positive
PA	PA-36-2	718	Widest	603	Unit	30	150	25	4	Positive
PA	PA-36-3	716	Widest	601	Unit	30	150	25	4	Positive
PA	PA-36-4	714	Widest	599	Unit	30	150	25	4	Positive
PA	PA-36-5	712	Widest	597	Unit	30	150	25	4	Positive
PA	PA-36-6	710	Widest	595	Unit	30	150	25	4	Positive
PA	PA-34-0	694	Widest	579	Unit	30	150	25	4	Positive
PA	PA-34-1	692	Widest	577	Unit	30	150	25	4	Positive
PA	PA-34-2	690	Widest	575	Unit	30	150	25	4	Positive
PA	PA-34-3	688	Widest	573	Unit	30	150	25	4	Positive
PA	PA-34-4	686	Widest	571	Unit	30	150	25	4	Positive
PA	PA-32-2	662	Widest	547	Unit	30	150	25	4	Positive
PC	PC-40-2	842	Widest	184	Unit	30	150	35	4	Positive
PC	PC-40-3	840	Widest	184	Unit	30	150	35	4	Positive
PC	PC-40-4	838	Widest	184	Unit	30	150	35	4	Positive
PC	PC-38-2	814	Widest	184	Unit	30	150	35	4	Positive
PC	PC-38-3	812	Widest	184	Unit	30	150	35	4	Positive
PC	PC-38-4	810	Widest	184	Unit	30	150	35	4	Positive
PC	PC-36-1	788	Widest	184	Unit	30	150	35	4	Positive
PC	PC-36-2	786	Widest	184	Unit	30	150	35	4	Positive
PC	PC-36-3	784	Widest	184	Unit	30	150	35	4	Positive
PC	PC-36-4	782	Widest	184	Unit	30	150	35	4	Positive
PC	PC-36-5	780	Widest	184	Unit	30	150	35	4	Positive
PC	PC-36-6	778	Widest	184	Unit	30	150	35	4	Positive
PC	PC-34-0	762	Widest	184	Unit	30	150	35	4	Positive
PC	PC-34-1	760	Widest	184	Unit	30	150	35	4	Positive
PC	PC-34-2	758	Widest	184	Unit	30	150	35	4	Positive
PC	PC-34-3	756	Widest	184	Unit	30	150	35	4	Positive
PC	PC-34-4	754	Widest	184	Unit	30	150	35	4	Positive
PC	PC-32-0	734	Widest	184	Unit	30	150	35	4	Positive
PC	PC-32-1	732	Widest	184	Unit	30	150	35	4	Positive
PC	PC-32-2	730	Widest	184	Unit	30	150	35	4	Positive
PG	PG-38-1	822	Widest	633	Unit	30	150	25	4	Positive
PG	PG-38-2	820	Widest	631	Unit	30	150	25	4	Positive
PG	PG-38-3	818	Widest	629	Unit	30	150	25	4	Positive
PG	PG-36-1	794	Widest	605	Unit	30	150	25	4	Positive
PG	PG-36-2	792	Widest	603	Unit	30	150	25	4	Positive
PG	PG-36-3	790	Widest	601	Unit	30	150	25	4	Positive
PG	PG-36-4	788	Widest	599	Unit	30	150	25	4	Positive
PG	PG-36-5	786	Widest	597	Unit	30	150	25	4	Positive
PG	PG-36-6	784	Widest	595	Unit	30	150	25	4	Positive
PG	PG-34-0	768	Widest	579	Unit	30	150	25	4	Positive
PG	PG-34-1	766	Widest	577	Unit	30	150	25	4	Positive
PG	PG-34-2	764	Widest	575	Unit	30	150	25	4	Positive
PG	PG-34-3	762	Widest	573	Unit	30	150	25	4	Positive
PG	PG-34-4	760	Widest	571	Unit	30	150	25	4	Positive
PG	PG-32-0	740	Widest	551	Unit	30	150	25	4	Positive
PG	PG-32-1	738	Widest	549	Unit	30	150	25	4	Positive
PI	PI-40-2	936	Widest	659	Unit	50	150	21	4	Positive
PI	PI-40-3	934	Widest	657	Unit	50	150	21	4	Positive
PI	PI-40-4	932	Widest	655	Unit	50	150	21	4	Positive
PI	PI-38-2	908	Widest	631	Unit	50	150	21	4	Positive
PI	PI-38-3	906	Widest	629	Unit	50	150	21	4	Positive
PI	PI-38-4	904	Widest	627	Unit	50	150	21	4	Positive
PI	PI-36-1	882	Widest	605	Unit	50	150	21	4	Positive
PI	PI-36-2	880	Widest	603	Unit	50	150	21	4	Positive
PI	PI-36-3	878	Widest	601	Unit	50	150	21	4	Positive
PI	PI-36-4	876	Widest	599	Unit	50	150	21	4	Positive
PI	PI-36-5	874	Widest	597	Unit	50	150	21	4	Positive
PI	PI-36-6	872	Widest	595	Unit	50	150	21	4	Positive
PI	PI-34-0	856	Widest	579	Unit	50	150	21	4	Positive
PI	PI-34-1	854	Widest	577	Unit	50	150	21	4	Positive
PI	PI-34-2	852	Widest	575	Unit	50	150	21	4	Positive
PI	PI-34-3	850	Widest	573	Unit	50	150	21	4	Positive
PI	PI-34-4	848	Widest	571	Unit	50	150	21	4	Positive
PI	PI-32-0	828	Widest	551	Unit	50	150	21	4	Positive
PI	PI-32-1	826	Widest	549	Unit	50	150	21	4	Positive
PI	PI-32-2	824	Widest	547	Unit	50	150	21	4	Positive
PS	PS-40-1	846	Widest	661	Unit	30	150	21	4	Positive
PS	PS-40-2	844	Widest	659	Unit	30	150	21	4	Positive
PS	PS-40-3	842	Widest	657	Unit	30	150	21	4	Positive
PS	PS-40-4	840	Widest	655	Unit	30	150	21	4	Positive
PS	PS-38-1	818	Widest	633	Unit	30	150	21	4	Positive
PS	PS-38-2	816	Widest	631	Unit	30	150	21	4	Positive
PS	PS-38-3	814	Widest	629	Unit	30	150	21	4	Positive
PS	PS-38-4	812	Widest	627	Unit	30	150	21	4	Positive
PS	PS-36-1	790	Widest	605	Unit	30	150	21	4	Positive
PS	PS-36-2	788	Widest	603	Unit	30	150	21	4	Positive
PS	PS-36-3	786	Widest	601	Unit	30	150	21	4	Positive
PS	PS-36-4	784	Widest	599	Unit	30	150	21	4	Positive
PS	PS-36-5	782	Widest	597	Unit	30	150	21	4	Positive
PS	PS-36-6	780	Widest	595	Unit	30	150	21	4	Positive
PS	PS-34-0	764	Widest	579	Unit	30	150	21	4	Positive
PS	PS-34-1	762	Widest	577	Unit	30	150	21	4	Positive
PS	PS-34-2	760	Widest	575	Unit	30	150	21	4	Positive
SQDG	SQDG-36-1	847	Widest	225	Unit	30	150	55	4	Negative
SQDG	SQDG-36-2	845	Widest	225	Unit	30	150	55	4	Negative
SQDG	SQDG-36-3	843	Widest	225	Unit	30	150	55	4	Negative
SQDG	SQDG-36-4	841	Widest	225	Unit	30	150	55	4	Negative
SQDG	SQDG-36-5	839	Widest	225	Unit	30	150	55	4	Negative
SQDG	SQDG-36-6	837	Widest	225	Unit	30	150	55	4	Negative
SQDG	SQDG-34-1	819	Widest	225	Unit	30	150	55	4	Negative
SQDG	SQDG-34-2	817	Widest	225	Unit	30	150	55	4	Negative
SQDG	SQDG-34-3	815	Widest	225	Unit	30	150	55	4	Negative
SQDG	SQDG-34-4	813	Widest	225	Unit	30	150	55	4	Negative
SQDG	SQDG-34-5	811	Widest	225	Unit	30	150	55	4	Negative
SQDG	SQDG-34-6	809	Widest	225	Unit	30	150	55	4	Negative
SQDG	SQDG-32-1	791	Widest	225	Unit	30	150	55	4	Negative
SQDG	SQDG-32-2	789	Widest	225	Unit	30	150	55	4	Negative
SQDG	SQDG-32-3	787	Widest	225	Unit	30	150	55	4	Negative
std SQDG	SQDG-34-0	821	Widest	225	Unit	30	150	55	4	Negative
